# Supplementary material for: Individually customized transcranial temporal interference stimulation for focused modulation of deep brain structures: a simulation study with different head models
Source: PubMed Central journal article supplement (PMC7366675; doi:10.1038/s41598-020-68660-5), 2020-07-16
Supplement: 41598_2020_68660_MOESM1_ESM.pdf [file 41598_2020_68660_MOESM1_ESM.pdf]

# Supplementary Information

## **Individually customized transcranial temporal interference stimulation for focused modulation of deep brain structures: A simulation study with different head models**

Sangjun Lee<sup>a</sup>, Chany Lee<sup>b</sup>, Jimin Park<sup>a</sup>, Chang-Hwan Im<sup>a,\*</sup>

<sup>a</sup>Department of Biomedical Engineering, Hanyang University, Seoul, Republic of Korea

<sup>b</sup>Department of Structure & Function of Neural Network, Korea Brain Research Institute, Daegu, Republic of Korea

\*Corresponding Author

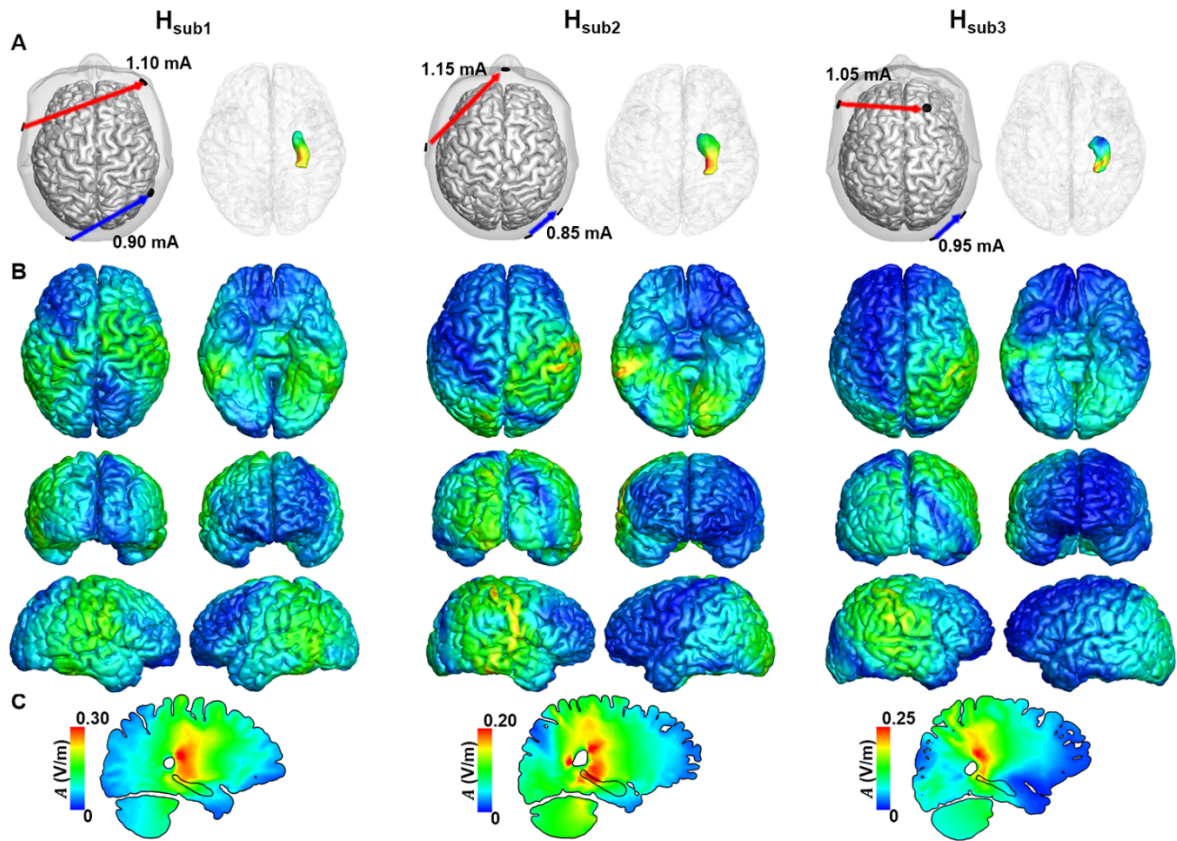

**Supplementary Figure 1.** Illustration of the electrode configurations and distribution of the TI envelope amplitudes optimized with the objective function set to  $A_{\text{tail}}/A_{\text{cortex}}$ , where  $A_{\text{tail}}$  represents the peak TI envelope amplitude at the target in the tail of the right hippocampus and  $A_{\text{cortex}}$  represents the peak TI envelope amplitude in the cortex. (a) Configurations of two electrode pairs (FT7-AF8 and O1-CP4 for  $H_{\text{sub1}}$ , T7-Fpz and O2-P6 for  $H_{\text{sub2}}$  and F7-F2 and O2-P6 for  $H_{\text{sub3}}$ ) (left) and distribution of TI envelope amplitude in the right hippocampus (right). (b) Distribution of the TI envelope amplitude in the cortex. (c) The medial view of the TI envelope amplitude distribution in the brain.

**Supplementary Table 1.** Peak TI envelope amplitudes and PR values optimized with the objective function set to  $A_{\text{tail}}/A_{\text{cortex}}$ . ' $A_{\text{tail}}$ ', and ' $A_{\text{cortex}}$ ' represent the peak TI envelope amplitude at the target in the tail of the right hippocampus and neocortical regions, respectively. PR denotes the ratio of  $A_{\text{tail}}$  to  $A_{\text{cortex}}$ .

| Head models       | Optimized TI stimulation |                     |      |
|-------------------|--------------------------|---------------------|------|
|                   | $A_{\text{tail}}$        | $A_{\text{cortex}}$ | PR   |
| $H_{\text{sub1}}$ | 0.23                     | 0.22                | 1.05 |
| $H_{\text{sub2}}$ | 0.21                     | 0.18                | 1.17 |
| $H_{\text{sub3}}$ | 0.22                     | 0.19                | 1.16 |

(Unit: V/m)

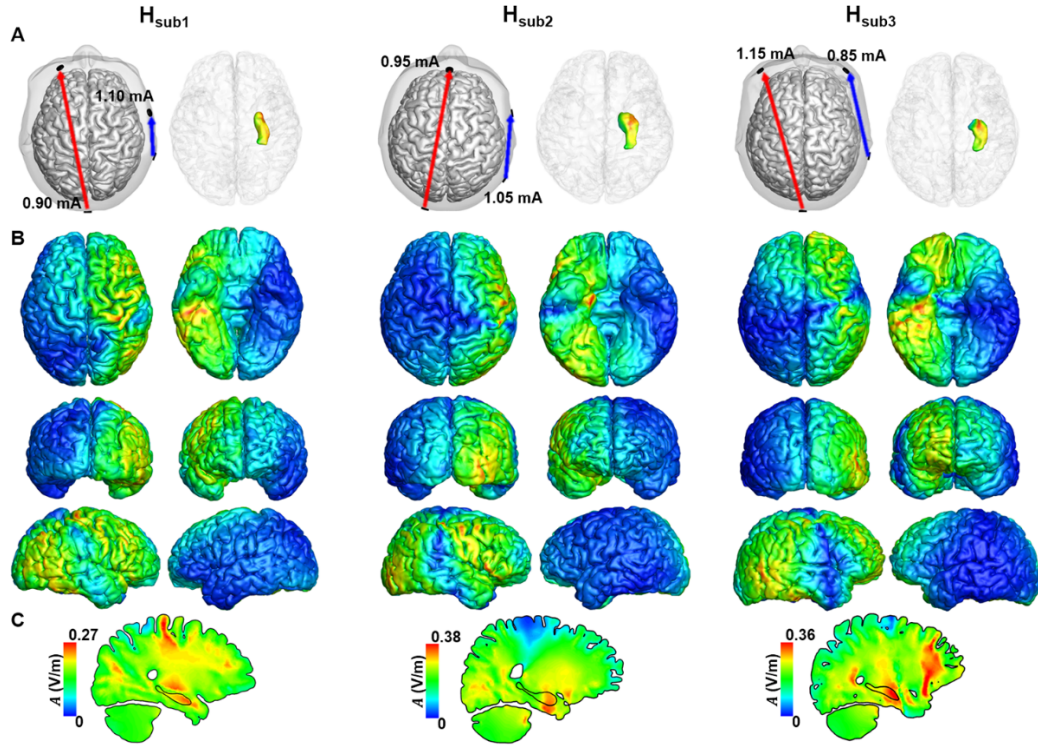

**Supplementary Figure 2.** Illustration of the electrode configurations and distribution of the TI envelope amplitudes optimized with the objective function set to  $A_{\text{hippo}}$  with the constraint that PR value should be greater than 1, where  $A_{\text{hippo}}$  represents the peak TI envelope amplitude at the target of the head of the right hippocampus and PR denote the ratio of  $A_{\text{hippo}}$  to the peak TI envelope amplitude in neocortical regions. (a) Configurations of two electrode pairs (Oz-AF3 and CP8-FC6 for  $H_{\text{sub1}}$ , O1-AFz and P8-FC8 for  $H_{\text{sub2}}$  and Oz-AF7 and CP8-AF8 for  $H_{\text{sub3}}$ ) (left) and distribution of TI envelope amplitude in the right hippocampus (right). (b) Distribution of the TI envelope amplitude in the cortex. (c) The medial view of the TI envelope amplitude distribution in the brain.

**Supplementary Table 2.** Peak TI envelope amplitudes and PR values optimized with the objective function set to  $A_{\text{hippo}}$  with the constraint that PR value should be greater than 1. ' $A_{\text{hippo}}$ ', and ' $A_{\text{cortex}}$ ' represent the peak TI envelope amplitude at the target in the head of the right hippocampus and neocortical regions, respectively. PR denotes the ratio of  $A_{\text{hippo}}$  to  $A_{\text{cortex}}$ .

| Head models       | Optimized TI stimulation |                     |      |
|-------------------|--------------------------|---------------------|------|
|                   | $A_{\text{hippo}}$       | $A_{\text{cortex}}$ | PR   |
| $H_{\text{sub1}}$ | 0.27                     | 0.27                | 1.00 |
| $H_{\text{sub2}}$ | 0.38                     | 0.38                | 1.00 |
| $H_{\text{sub3}}$ | 0.36                     | 0.36                | 1.00 |

(Unit: V/m)

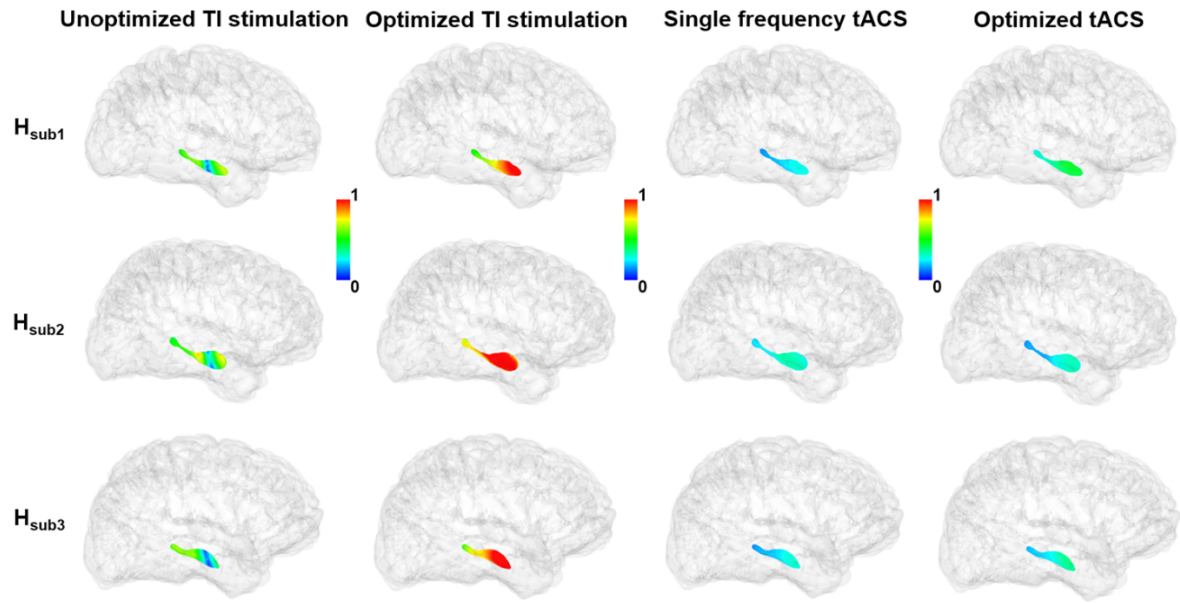

**Supplementary Figure 3.** Illustration of distributions of the TI envelope amplitude in the right hippocampus normalized with the peak TI envelope amplitude in neocortical area for different stimulation conditions and head models
